# Supplementary material for: Free-standing nanostructured vanadium pentoxide films for metal-ion batteries
Source: Royal Society of Chemistry journal article supplement (doi:10.1039/c8nr04033h), 2018-01-01
Supplement: c8nr04033h1.pdf [file c8nr04033h1.pdf]

## Supporting Information

### Free-Standing Nanostructured Vanadium Pentoxide Films for Metal-Ion Batteries

*Achim M. Diem, Andrea Knöller, Zaklina Burghard, and Joachim Bill*

**Table S1.**  $V_2O_5$  nanofiber length determined from AFM scans in dependence of the dispersion growth time.

| $V_2O_5$ nanofibers      | $V_2O_5$ -1 | $V_2O_5$ -2 | $V_2O_5$ -3 | $V_2O_5$ -4 |
|--------------------------|-------------|-------------|-------------|-------------|
| Growth time (d)          | 3           | 14          | 28          | 42          |
| Length ( $\mu\text{m}$ ) | 0.54 + 0.47 | 1.13 + 0.46 | 1.30 + 0.64 | 1.95 + 0.51 |

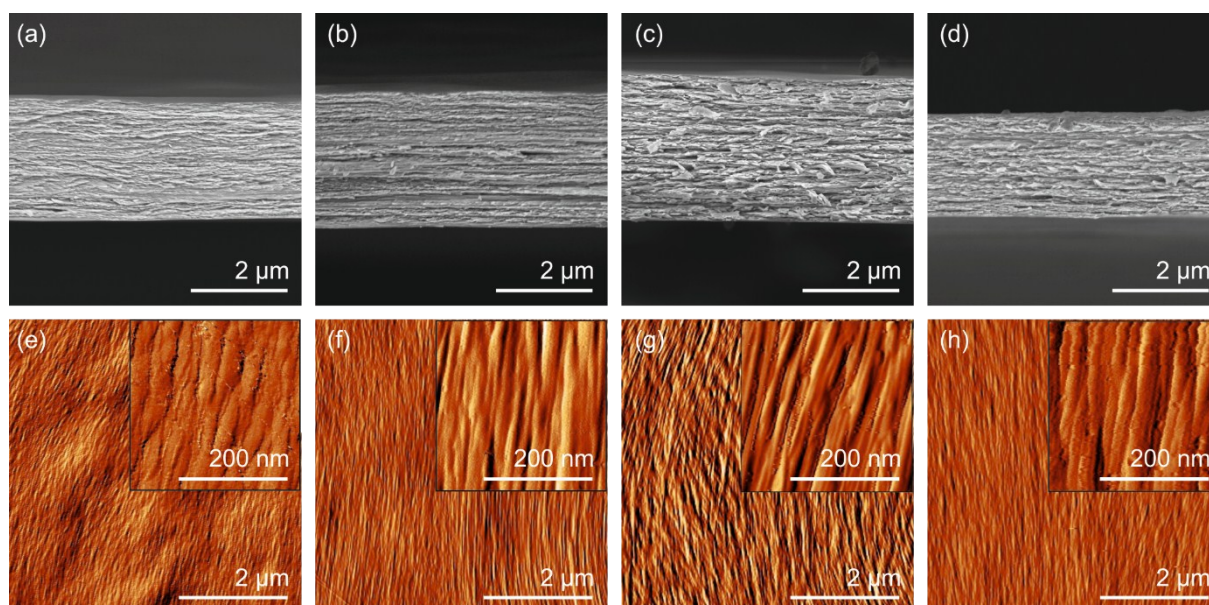

**Figure S1.** (a)-(d) SEM cross-section images of paper's fracture surface for (a)  $V_2O_5$ -1/PT, (b)  $V_2O_5$ -2/PT, (c)  $V_2O_5$ -3/PT and (d)  $V_2O_5$ -4/PT. (e)-(h) AFM amplitude images with an inset of higher magnification of the paper's surface for (e)  $V_2O_5$ -1/PT, (f)  $V_2O_5$ -2/PT, (g)  $V_2O_5$ -3/PT and (h)  $V_2O_5$ -4/PT.

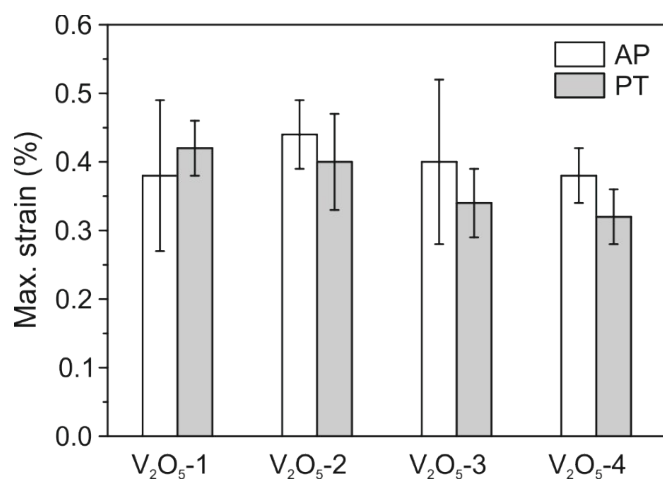

**Figure S2.** Determined maximum strain for AP and PT samples obtained from nanotensile tests.
